# Supplementary material for: A liquid chromatography-tandem mass spectrometry method for the determination of apixaban in human plasma and its application to pharmacokinetics studies in the Indian population
Source: Royal Society of Chemistry journal article supplement (doi:10.1039/d1ay00837d), 2021-01-01
Supplement: d1ay00837d1.pdf [file d1ay00837d1.pdf]

## Supplementary Data

### Liquid chromatography–tandem mass spectrometry method for determination of apixaban in human plasma and its application to pharmacokinetic study in Indian population

#### 1. Optimization of extraction method

Different sample preparation techniques have been tested, such as protein precipitation extraction (PPE) using methanol, acetonitrile and mixtures of both; liquid-liquid extraction (LLE) using diethyl ether, t-butyl methyl ether and dichloromethane and solid phase extraction (SPE) using Strata X, Oasis HLB, Hypurit HLB and Plexa bond elute using water, methanol, formic acid and ammonia in various washing trials. In order to eliminate interference during analyte and IS at the retention periods, optimization was performed. Trials have been performed to achieve consistent recovery. The samples prepared using Strata-X 33  $\mu\text{m}$ , SPE (Phenomenex) polymer sorbent (30 mg/mL) and 10% methanol as washing solution and methanol as eluent for solid-phase extraction provided excellent and consistent recovery and cleanliness without compromise. For a stable, accurate approach that is essentially consistent, matrix effects may thus be removed using Strata-X. The results of each extraction trials are mentioned below:

**Table 1: Protein Precipitation extraction (PPE)**

| Trial | Solvent used                       | Plasma sample volume | Results      | Revised plasma sample volume | Result/ Inference                                             |
|-------|------------------------------------|----------------------|--------------|------------------------------|---------------------------------------------------------------|
| 1     | Methanol                           | 100 $\mu\text{L}$    | Low response | 250 $\mu\text{L}$            | Sufficient response, Poor chromatography, ion enhancement.    |
| 2     | Acetonitrile                       | 100 $\mu\text{L}$    | Low response | 250 $\mu\text{L}$            | Sufficient response, ion enhancement.                         |
| 3     | Methanol : Acetonitrile (1:1, v/v) | 100 $\mu\text{L}$    | Low response | 250 $\mu\text{L}$            | Matrix effect due to ion enhancement not reduced with various |
| 4     | Methanol : Acetonitrile (2:1, v/v) | 100 $\mu\text{L}$    | Low response | 250 $\mu\text{L}$            | proportions trials; hence ruled out.                          |
| 5     | Methanol : Acetonitrile (1:2, v/v) | 100 $\mu\text{L}$    | Low response | 250 $\mu\text{L}$            |                                                               |

## Supplementary Data

**Table 2: Liquid-liquid extraction (LLE)**

| Trial | Solvent used                               | Solvent volume | Plasma sample volume | Results                                              | Inference                                                                                                                                                                                  |
|-------|--------------------------------------------|----------------|----------------------|------------------------------------------------------|--------------------------------------------------------------------------------------------------------------------------------------------------------------------------------------------|
| 1     | Diethyl Ether                              | 2 mL           | 100 $\mu$ L          | Low response                                         | Not further used.                                                                                                                                                                          |
| 2     | TBME                                       | 2 mL           | 100 $\mu$ L          | Good and consistent response but poor chromatography | Checked response with different proportions of organic solvents and with different make of available C18 columns <sup>1</sup> . Similar results with different column check were observed. |
| 3     | Dichloromethane                            | 2 mL           | 100 $\mu$ L          | Response is satisfactory, good chromatography        |                                                                                                                                                                                            |
| 4     | Dichloromethane : Diethyl Ether (1:1, v/v) | 2 mL           | 100 $\mu$ L          | Response is satisfactory, good chromatography        |                                                                                                                                                                                            |
| 5     | Dichloromethane : TBME (1:1, v/v)          | 2 mL           | 100 $\mu$ L          | Response is satisfactory, good chromatography        | Overall response using Gemini C18 column, 50 mm x 4.6 mm, 3 $\mu$ m was found as per requirements but ion enhancement still persists; hence ruled out.                                     |

<sup>1</sup>Kromasil 100-5 C18, 50 mm x 4.6 mm, 5 $\mu$ m; Gemini C18 column, 50 mm x 4.6 mm, 3 $\mu$ m; and ACE super C18, 50 mm x 4.6 mm, 5 $\mu$ m  
TBME t-butyl methyl ether

## Supplementary Data

**Table 3: Solid phase extraction (SPE)**

| <b>Trial</b> | <b>Plasma sample volume</b> | <b>Cartridges</b>           | <b>Make</b>             | <b>Sample pre-treatment condition</b> | <b>Elution</b> | <b>Further treatment after elution</b>                                                               | <b>Result/ Inference</b>                                                     |
|--------------|-----------------------------|-----------------------------|-------------------------|---------------------------------------|----------------|------------------------------------------------------------------------------------------------------|------------------------------------------------------------------------------|
| 1            | 100 µL                      | Strata X, (30mg/1mL)        | Phenomenex              | Neutral                               | Mobile phase   | --                                                                                                   | Slight ion enhancement observed; good response and chromatography.           |
| 2            | 100 µL                      | Strata X, (30mg/1mL)        | Phenomenex              | Neutral                               | Methanol       | Evaporated to dryness in nitrogen evaporator at 50°C and reconstituted with 1000 µL of mobile phase. | Precise, accurate and reliable for further analysis under method validation. |
| 3            | 100 µL                      | Oasis HLB, (1 cc/30 mg)     | Waters                  | Neutral                               | Mobile phase   | --                                                                                                   | Slight ion enhancement observed; good response and chromatography.           |
| 4            | 100 µL                      | Oasis HLB, (1 cc/30 mg)     | Waters                  | Neutral                               | Methanol       | Evaporated to dryness in nitrogen evaporator at 50°C and reconstituted with 1000 µL of mobile phase. | Precise, accurate and reliable for further analysis under method validation. |
| 5            | 100 µL                      | Hypurit HLB (1 cc/30 mg)    | National Chromatography | Neutral                               | Mobile phase   | --                                                                                                   | Slight ion enhancement observed; good response and chromatography.           |
| 6            | 100 µL                      | Hypurit HLB (1 cc/30 mg)    | National Chromatography | Neutral                               | Methanol       | Evaporated to dryness in nitrogen evaporator at 50°C and reconstituted with 1000 µL of mobile phase. | Precise, accurate and reliable for further analysis under method validation. |
| 7            | 100 µL                      | Plexa bond elute (50mg/1mL) | Agilent                 | Neutral                               | Mobile phase   | --                                                                                                   | Slight ion enhancement observed; good response and chromatography.           |
| 8            | 100 µL                      | Plexa bond elute (50mg/1mL) | Agilent                 | Neutral                               | Methanol       | Evaporated to dryness in nitrogen evaporator at 50°C and reconstituted with 1000 µL of mobile phase. | Precise, accurate and reliable for further analysis under method validation. |

All the SPE analysis was performed with Gemini C18 column, 50 mm x 4.6 mm, 3µm and a mixture of acetonitrile: 2 mM ammonium formate buffer (50:50 v/v) as mobile phase.

All the results using above mentioned SPE cartridges were found to be similar. Further method of analysis was selected on the grounds that it would be the least expensive of all.

## Supplementary Data

### 2. Comparison with reported methods

**Table 4:** Comparison of salient features of the present techniques with reported techniques for quantitative determination of apixaban

| Technique | LLOQ (ng/mL) | Linear range (ng/mL) | Extraction method | Sample volume ( $\mu$ L) | Run time (min) | Application           | References No. |
|-----------|--------------|----------------------|-------------------|--------------------------|----------------|-----------------------|----------------|
| LC-MS/MS  | 1.01         | 1.01 - 280           | SPE               | 100                      | 1.8            | PK study              | Present method |
| LC-MS/MS  | 5            | 5 - 500              | PPE               | 100                      | 1.3            | PK study              | 11             |
| LC-MS/MS  | 1            | 1.0 - 1000           | SPE               | 100                      | 3              | Clinical study        | 12             |
| LC-MS/MS  | 9.7          | 9.7 - 970            | PPE               | 50                       | 1              | PK study              | 13             |
| LC-MS/MS  | 1            | 1 - 500              | PPE               | 100                      | 6              | None                  | 14             |
| LC-MS/MS  | 23           | 23 - 750             | PPE               | 100                      | 4.75           | Coagulation assay     | 15             |
| LC-MS/MS  | 1            | 1 - 500              | PPE               | 50                       | 2.5            | Clinical study        | 16             |
| LC-MS/MS  | 1            | 1 - 500              | SPE               | 200                      | 10             | Anticoagulant therapy | 17             |
| LC-MS/MS  | 1            | 1 - 100              | PPE               | 100                      | 3.5            | PK study on rat       | 18             |
| LC-MS/MS  | 2            | 2 - 500              | PPE <sup>1</sup>  | 50                       | 2              | Clinical study        | 19             |
| LC-MS/MS  | 1            | 1 - 1000             | SPE <sup>2</sup>  | 100                      | 4              | Clinical study        | 20             |
| LC-UV/VIS | 16           | 20 - 200             | PPE               | 100                      | 7              | TDM                   | 21             |

<sup>1</sup>PPE followed by magnetic separation. <sup>2</sup>SPE 96 well plate method.  
TDM therapeutic drug monitoring
